# Supplementary material for: Diagnosis of metabolic syndrome in nursing professionals: An accuracy study
Source: PubMed Central journal article supplement (PMC11164393; doi:10.1371/journal.pone.0295985), 2024-06-10
Supplement: pone.0295985.s002.pdf [file pone.0295985.s002.pdf]

**PROJECT: "BURNOUT SYNDROME AND METABOLIC SYNDROME IN PRIMARY HEALTH CARE  
NURSING PROFESSIONALS"  
CODE BOOK  
Sociodemographic, Labor, Lifestyle and Human Biology Questionnaire**

|                                                                                                       |
|-------------------------------------------------------------------------------------------------------|
| <b>Questionnaire number (NQUEST)</b>                                                                  |
| Ascending order – cardinal number                                                                     |
| <b>Profession (PROF)</b>                                                                              |
| 0 Nurses      1 Nursing Technician / Auxiliary                                                        |
| <b>Age in years (IDAD)</b>                                                                            |
| 0 Up to 35 years      1 36 years or more                                                              |
| <b>Sex (SEX)</b>                                                                                      |
| 0 Male 1 Female                                                                                       |
| <b>Residence (RESID2)</b>                                                                             |
| 0 Rural area    1 Urban area                                                                          |
| <b>Self-reported race/ (COR2)</b>                                                                     |
| 0 Non-black or undeclared    1 Black                                                                  |
| <b>Level of education (ESCOL)</b>                                                                     |
| 01 Technical Level    02 Bachelor's Degree    03 Specialization    04 Master's Degree    05 Doctorate |
| <b>Family income in minimum wages (RENDA2)</b>                                                        |
| 0    3 or more minimum wages      1 Up to 2    minimun wages                                          |
| <b>Marital Status (ESTCI2)</b>                                                                        |

0 with a partner 1 without a partner

**Number of children (NFIL2)**

0 without children 1 with children

**Number of dichotomized children (NFILDIC)**

0 to 2 children 1 3 or more children

**You have hypertension (HIPERTDIC)**

0 No 1 Yes

**You have Diabetes (DIABDIC)**

0 No 1 Yes

**You have cardiovascular problems (CARDDIC)**

0 No 1 Yes

**You have polycystic ovary (OVPOLI)**

0 No 1 Yes 04 Not applicable

**Have you ever felt the need to undergo psychiatric or psychological treatment (PSIQ2)**

0 No 1 Yes

**You do physical exercises (ATIVFIS)**

0 Yes 1 no

**Uses hypoglycemic medications, corticosteroids, beta-blockers, or diuretics (MEDIC2)**

0 No 1 Yes

**You currently smoke (FUMA)**

0 No 1 Yes

**You drink alcohol (BEBE)**

|                                                                                                                |
|----------------------------------------------------------------------------------------------------------------|
| 0 No 1 Yes                                                                                                     |
| <b>You have periodontal disease (PERIO2DIC)</b>                                                                |
| 0 No 1 Yes                                                                                                     |
| <b>Weight (PESO)</b>                                                                                           |
| Describe                                                                                                       |
| <b>Height (ALTURA)</b>                                                                                         |
| Describe                                                                                                       |
| <b>Body Mass Index (IMC)</b>                                                                                   |
| Describe                                                                                                       |
| <b>Systolic Blood Pressure (PISIS)</b>                                                                         |
| Describe                                                                                                       |
| <b>Diastolic Blood Pressure (PADIAS)</b>                                                                       |
| Describe                                                                                                       |
| <b>Systolic / Diastolic Blood Pressure (PASISDIA)</b>                                                          |
| Describe SYSBP/DIASBP                                                                                          |
| <b>Blood pressure criteria IDF - (PAIDF) (MetS IDF, AACE, NCEP and IDF/AHA/NHLBI <math>\geq</math> 130/85)</b> |
| 0 No 1 Yes                                                                                                     |
| <b>Altered blood pressure or treatment for sistemic arterial hypertension (SAH) IDF (PAIDF 2)</b>              |
| 0 No (PAIDF and HYPERT =0) 1 Yes (PAIDF and/or HYPERT=1)                                                       |
| <b>Blood pressure criteria WHO/EGIR- (MetS WHO and EGIR <math>\geq</math>140/90) - (PAWHO)</b>                 |
| 0 No 1 Yes                                                                                                     |
| <b>Altered blood pressure or use of antihypertensive drugs (with SAH) criteria WHO- (PAWHO2)</b>               |

0 No (PAWHO and/or HIPERT=0) 1 YES (PAWHO and/or HIPERT=1)

**METS Barbosa 2006 criteria (SMBARB)**

Sum of number of changed items (maximum 5 minimum 0) (GLIIF2+CABARB+HDLIDF+TRIGIDF+PAIDF2)

**METS Barbosa 2006 (SMBARB2)**

0 No 1 Yes

**METS AHA (SMAHA)**

Sum of number of changed items (maximum 5 minimum 0) (GLIIF2+CAIDF+HDLIDF+TRIGIDF+PAIDF2)

**Dichotomized METS AHA SMAHA $\geq$ 3 (SMAHA2)**

0 No 1 Yes

**METS NCEP (SMNCEP)**

Sum of number of changed items (maximum 5 minimum 0) (GLIIF2+CANCEP+HDLIDF+TRIGIDF+PAIDF2)

**Dichotomized NCEP METS (SMNCEP $\geq$ 3) (SMNCEP2)**

0 No 1 Yes

**METS AACE (SMAACE)**

Sum of criteria only (Maximum 4) (HDLIDF+TRIGIDF+PAIDF+GLIAACE)

**Dichotomized METS AACE - ALTORISCORES (mandatory)+ SMAACE  $\geq$ 2 (SMAACE2)**

0 No 1 Yes

**METS EGIR (SMEGIR)**

Sum of number of changed items (maximum 4 minimum 0) (CAEGIR+HDLEGIR+TRIGIDF+PAWHO)

**METS EGIR dichotomized GLIWHO (Mandatory)+ SMEGIR  $\geq$  2 – DIABDIC (SMEGIR2)**

0 No 1 Yes

**METS IDF (SMIDF)**

|                                                                                                                                      |
|--------------------------------------------------------------------------------------------------------------------------------------|
| Sum of number of changed items (maximum 4 minimum 0) (GLIIDF2+HDLIDF+TRIGIDF+PAIDF2)                                                 |
| <b>METS dichotomized IDF CAIDF (required) + SMIDF <math>\geq</math> 2 (SMIDF2)</b>                                                   |
| 0 No 1 Yes                                                                                                                           |
| <b>METS WHO (SMWHO)</b>                                                                                                              |
| Sum of number of changed items (maximum 4 minimum 0) (IMC +HDLWHO+TRIGIDF+PAWHO2)                                                    |
| <b>METS WHO criteria (SMWHO1)</b>                                                                                                    |
| Sum of number of changed items (maximum 5 minimum 0) (IMC +HDLWHO+TRIGIDF+PAWHO2+ MICROAL)                                           |
| <b>METS WHO dichotomized GLIWHO (required) + SMWHO <math>\geq</math> 2 (SMWHO2)</b>                                                  |
| 0 No 1 Yes                                                                                                                           |
| <b>Sum of individuals with MetS in 5 different criteria without WHO (SMAHA2, SMAACE2+SMNCEP2+SMIDF2+SMEGIR2) (SOMA5CRIT)</b>         |
| Number of positive criteria (minimum 0 maximum 5)                                                                                    |
| <b>Sum of individuals with MetS in 6 different criteria with WHO (SMAHA2, SMAACE2+ SMNCEP2+ SMIDF2+ SMEGIR2+ SMWHO2) (SOMA6CRIT)</b> |
| Number of positive criteria (minimum 0 maximum 5)                                                                                    |
| <b>Group of individuals who have MetS in all 6 criteria including WHO (AGRUP)</b>                                                    |
| 0 No 1 Yes                                                                                                                           |
| <b>Group of individuals who have MetS in 05 criteria except WHO (BGRUP)</b>                                                          |
| 0 No 1 Yes                                                                                                                           |
| <b>Group of individuals with MetS from 1 to 4 criteria except WHO (CGRUP)</b>                                                        |
| 0 No 1 Yes                                                                                                                           |
| <b>Group of individuals who do not have MetS by any criteria (DGRUP)</b>                                                             |
| 0 No 1 Yes                                                                                                                           |
| <b>Waist Circumference (CA)</b>                                                                                                      |

|                                                                      |
|----------------------------------------------------------------------|
| Describe                                                             |
| <b>Waist Circumference EGIR (CAEGIR)</b>                             |
| 0 <94 men and <80 women      1 ≥94 men and ≥80 women                 |
| <b>Waist Circumference NCEP (CANCEP)</b>                             |
| 0 <102 men and <88 women      1 ≥102 men and ≥88 women               |
| <b>Waist Circumference IDF (CAIDF) (mets IDF and IDF/AHA/NHLBI)</b>  |
| 0 <90 men and <80 women      1 ≥90 men and ≥80 women                 |
| <b>Waist Circumference BARBOSA (CABARB) (Mets Barbosa)</b>           |
| 0 <88 men and <84 women      1 ≥88 men and ≥84 women                 |
| <b>Fasting Blood Glucose (HGT)</b>                                   |
| Describe                                                             |
| <b>Triglycerides (TRIGL)</b>                                         |
| Describe                                                             |
| <b>HDL-C (HDL)</b>                                                   |
| Describe                                                             |
| <b>HDL-C WHO (HDLWHO)</b>                                            |
| 0 ≥ 35 men and ≥39 women      1 < 35 men and <39 women               |
| <b>HDL-C IDF (HDLIDF) (serves AACE, NCEP, IDF and IDF/AHA/NHLBI)</b> |
| 0 ≥ 40 men and ≥50 women      1 <40 men and < 50 women               |
| <b>HDL-C EGIR (HDLEGIR)</b>                                          |
| 0 ≥ 39 men and women      1 < 39 men and women                       |
| <b>BMI WHO (IMCWHO)</b>                                              |

0 < 30 KG/m<sup>2</sup>    1 ≥ 30KG/m<sup>2</sup>

**Glycemia WHO (Mets WHO and EGIR) (GLIWHO)**

0 <110 mg/dl    1 ≥110mg/dl

**IDF Glycemia (Mets NCEP, IDF , IDF/AHA/NHLBI) (GLIIDF)**

0 <100 mg/dl    1 ≥100mg/dl

**Altered blood glucose or treatment for diabetes IDF (GLIDF2)**

0 no (GLIIDF and DIAB =0)    1 YES (GLIIDF and/or DIAB=1)

**Glycemia AACE 110-125 (GLIAACE)**

0 <110 or >125    1 110 to 125

**Triglycerides IDF (TRIGIDF) (Mets all criteria)**

0 <150 mg/dl    1 ≥150mg/dl

**Presence of Acanthosis Nigricans (ACANNIGRI)**

0 No    1 Yes

**You have nonalcoholic liver disease (DOHEPALC)**

0 No    1 Yes

**Have obstructive sleep apnea (APNOBST2)**

0 No    1 Yes

**Burnout Syndrome (BSDIC)**

0 no    1 yes

**Fasting Insulin (INSJEJ)**

Describe

**Dichotomized SB (Ramirez Criteria) (BSDIC)**

0 no 1 yes

**METS-NCEP 2001 (SM2001)**

number of criteria by NCEP 2006

**METS dichotomized NCEP 2001 (SMDIC2001)**

0 no 1 yes

**BMI AACE (IMCAACE)**

0 <25KG/m<sup>2</sup> 1 ≥ 25KG/m<sup>2</sup>

**High-risk insulin resistance (ALTORISCRES)**

0 No 1 YES

**Insulin resistance (INSURES)**

0 No 1 Yes
