# Supplementary material for: Diagnosis of metabolic syndrome in nursing professionals: An accuracy study
Source: PubMed Central journal article supplement (PMC11164393; doi:10.1371/journal.pone.0295985), 2024-06-10
Supplement: pone.0295985.s003.pdf [file pone.0295985.s003.pdf]

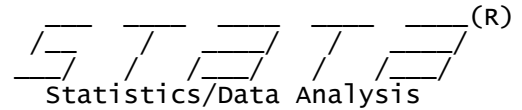

User: dicotomização SM parte 1{space -2}

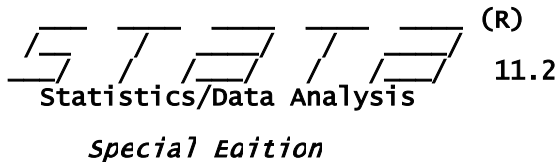

Copyright 1985-2009 StataCorp LP  
 StataCorp  
 4905 Lakeway Drive  
 College Station, Texas 77845 USA  
 800-STAT-PC <http://www.stata.com>  
 979-696-4600 [stata@stata.com](mailto:stata@stata.com)  
 979-696-4601 (fax)

Single-user Stata license expires 31 Dec 9999:  
 Serial number: 71606281563  
 Licensed to: STATAForAll  
 STATA

Notes:

1. (/m# option or -set memory-) 50.00 MB allocated to data
2. (/v# option or -set maxvar-) 5000 maximum variables

- 1 . use "c:\Users\enfae\Documents\síndrome metabólica\Projeto 2021\Banco de dados SM Magno\ban
- 2 . tab idad2 sex, row col chi

|                          |
|--------------------------|
| Key                      |
| <i>frequency</i>         |
| <i>row percentage</i>    |
| <i>column percentage</i> |

| idad2 | sex    |        | Total  |
|-------|--------|--------|--------|
|       | 0      | 1      |        |
| 0     | 75     | 504    | 579    |
|       | 12.95  | 87.05  | 100.00 |
|       | 55.15  | 51.69  | 52.12  |
| 1     | 61     | 471    | 532    |
|       | 11.47  | 88.53  | 100.00 |
|       | 44.85  | 48.31  | 47.88  |
| Total | 136    | 975    | 1,111  |
|       | 12.24  | 87.76  | 100.00 |
|       | 100.00 | 100.00 | 100.00 |

Pearson chi2(1) = 0.5708 Pr = 0.450

- 3 . tab cor2 sex, row col chi

|                          |
|--------------------------|
| Key                      |
| <i>frequency</i>         |
| <i>row percentage</i>    |
| <i>column percentage</i> |

| cor2  | sex                    |                        | Total                     |
|-------|------------------------|------------------------|---------------------------|
|       | 0                      | 1                      |                           |
| 0     | 38<br>13.57<br>27.94   | 242<br>86.43<br>24.82  | 280<br>100.00<br>25.20    |
| 1     | 98<br>11.79<br>72.06   | 733<br>88.21<br>75.18  | 831<br>100.00<br>74.80    |
| Total | 136<br>12.24<br>100.00 | 975<br>87.76<br>100.00 | 1,111<br>100.00<br>100.00 |

Pearson chi2(1) = 0.6166 Pr = 0.432

4 . tab resid2 sex, row col chi

|                          |
|--------------------------|
| Key                      |
| <i>frequency</i>         |
| <i>row percentage</i>    |
| <i>column percentage</i> |

| resid2 | sex                    |                        | Total                     |
|--------|------------------------|------------------------|---------------------------|
|        | 0                      | 1                      |                           |
| 0      | 39<br>21.43<br>28.68   | 143<br>78.57<br>14.67  | 182<br>100.00<br>16.38    |
| 1      | 97<br>10.44<br>71.32   | 832<br>89.56<br>85.33  | 929<br>100.00<br>83.62    |
| Total  | 136<br>12.24<br>100.00 | 975<br>87.76<br>100.00 | 1,111<br>100.00<br>100.00 |

Pearson chi2(1) = 17.1015 Pr = 0.000

5 . tab estci2 sex, row col chi

|                          |
|--------------------------|
| Key                      |
| <i>frequency</i>         |
| <i>row percentage</i>    |
| <i>column percentage</i> |

| estci2 | sex                  |                       | Total                  |
|--------|----------------------|-----------------------|------------------------|
|        | 0                    | 1                     |                        |
| 0      | 70<br>11.71<br>51.47 | 528<br>88.29<br>54.15 | 598<br>100.00<br>53.83 |
| 1      | 66<br>12.87<br>48.53 | 447<br>87.13<br>45.85 | 513<br>100.00<br>46.17 |
| Total  | 136<br>12.24         | 975<br>87.76          | 1,111<br>100.00        |

| 100.00 100.00 | 100.00

Pearson chi2(1) = 0.3458 Pr = 0.557

6 . tab nfil2 sex, row col chi

|                          |
|--------------------------|
| Key                      |
| <i>frequency</i>         |
| <i>row percentage</i>    |
| <i>column percentage</i> |

| nfil2 | sex    |        | Total  |
|-------|--------|--------|--------|
|       | 0      | 1      |        |
| 0     | 67     | 383    | 450    |
|       | 14.89  | 85.11  | 100.00 |
|       | 49.26  | 39.28  | 40.50  |
| 1     | 69     | 592    | 661    |
|       | 10.44  | 89.56  | 100.00 |
|       | 50.74  | 60.72  | 59.50  |
| Total | 136    | 975    | 1,111  |
|       | 12.24  | 87.76  | 100.00 |
|       | 100.00 | 100.00 | 100.00 |

Pearson chi2(1) = 4.9356 Pr = 0.026

7 . tab nfildic sex, row col chi

|                          |
|--------------------------|
| Key                      |
| <i>frequency</i>         |
| <i>row percentage</i>    |
| <i>column percentage</i> |

| nfildic | sex    |        | Total  |
|---------|--------|--------|--------|
|         | 0      | 1      |        |
| 0       | 122    | 834    | 956    |
|         | 12.76  | 87.24  | 100.00 |
|         | 89.71  | 85.54  | 86.05  |
| 1       | 14     | 141    | 155    |
|         | 9.03   | 90.97  | 100.00 |
|         | 10.29  | 14.46  | 13.95  |
| Total   | 136    | 975    | 1,111  |
|         | 12.24  | 87.76  | 100.00 |
|         | 100.00 | 100.00 | 100.00 |

Pearson chi2(1) = 1.7266 Pr = 0.189

8 . tab prof sex, row col chi

|                          |
|--------------------------|
| Key                      |
| <i>frequency</i>         |
| <i>row percentage</i>    |
| <i>column percentage</i> |

| prof  | sex                    |                        | Total                     |
|-------|------------------------|------------------------|---------------------------|
|       | 0                      | 1                      |                           |
| 0     | 64<br>14.16<br>47.06   | 388<br>85.84<br>39.79  | 452<br>100.00<br>40.68    |
| 1     | 72<br>10.93<br>52.94   | 587<br>89.07<br>60.21  | 659<br>100.00<br>59.32    |
| Total | 136<br>12.24<br>100.00 | 975<br>87.76<br>100.00 | 1,111<br>100.00<br>100.00 |

Pearson chi2(1) = 2.6096 Pr = 0.106

9 . tab renda2 sex, row col chi

|                          |
|--------------------------|
| Key                      |
| <i>frequency</i>         |
| <i>row percentage</i>    |
| <i>column percentage</i> |

| renda2 | sex                    |                        | Total                     |
|--------|------------------------|------------------------|---------------------------|
|        | 0                      | 1                      |                           |
| 0      | 83<br>13.86<br>61.03   | 516<br>86.14<br>52.92  | 599<br>100.00<br>53.92    |
| 1      | 53<br>10.35<br>38.97   | 459<br>89.65<br>47.08  | 512<br>100.00<br>46.08    |
| Total  | 136<br>12.24<br>100.00 | 975<br>87.76<br>100.00 | 1,111<br>100.00<br>100.00 |

Pearson chi2(1) = 3.1565 Pr = 0.076

10 . tab fuma sex, row col chi

|                          |
|--------------------------|
| Key                      |
| <i>frequency</i>         |
| <i>row percentage</i>    |
| <i>column percentage</i> |

| fuma  | sex                    |                        | Total                     |
|-------|------------------------|------------------------|---------------------------|
|       | 0                      | 1                      |                           |
| 0     | 95<br>9.71<br>69.85    | 883<br>90.29<br>90.56  | 978<br>100.00<br>88.03    |
| 1     | 41<br>30.83<br>30.15   | 92<br>69.17<br>9.44    | 133<br>100.00<br>11.97    |
| Total | 136<br>12.24<br>100.00 | 975<br>87.76<br>100.00 | 1,111<br>100.00<br>100.00 |

Pearson chi2(1) = 48.5821 Pr = 0.000

11 . tab bebe2 sex, row col chi

|                          |
|--------------------------|
| Key                      |
| <i>frequency</i>         |
| <i>row percentage</i>    |
| <i>column percentage</i> |

| bebe2 | sex                    |                        | Total                     |
|-------|------------------------|------------------------|---------------------------|
|       | 0                      | 1                      |                           |
| 0     | 33<br>8.11<br>24.26    | 374<br>91.89<br>38.36  | 407<br>100.00<br>36.63    |
| 1     | 103<br>14.63<br>75.74  | 601<br>85.37<br>61.64  | 704<br>100.00<br>63.37    |
| Total | 136<br>12.24<br>100.00 | 975<br>87.76<br>100.00 | 1,111<br>100.00<br>100.00 |

Pearson chi2(1) = 10.2135 Pr = 0.001

12 . tab atvfis sex, row col chi

|                          |
|--------------------------|
| Key                      |
| <i>frequency</i>         |
| <i>row percentage</i>    |
| <i>column percentage</i> |

| atvfis | sex                  |                       | Total                  |
|--------|----------------------|-----------------------|------------------------|
|        | 0                    | 1                     |                        |
| 0      | 85<br>13.49<br>62.50 | 545<br>86.51<br>55.90 | 630<br>100.00<br>56.71 |
| 1      | 51<br>10.60<br>37.50 | 430<br>89.40<br>44.10 | 481<br>100.00<br>43.29 |
| Total  | 136<br>12.24         | 975<br>87.76          | 1,111<br>100.00        |

| 100.00 100.00 | 100.00  
 Pearson chi2(1) = 2.1193 Pr = 0.145

- 13 . gen peso5g= peso
- 14 . replace peso5g=1 if peso5g>=41& peso5g<56  
 (138 real changes made)
- 15 . replace peso5g=2 if peso5g>=56& peso5g<71  
 (504 real changes made)
- 16 . replace peso5g=3 if peso5g>=71& peso5g<86  
 (316 real changes made)
- 17 . replace peso5g=4 if peso5g>=86& peso5g<101  
 (123 real changes made)
- 18 . replace peso5g=5 if peso5g>=101  
 (30 real changes made)
- 19 . tab peso5g

| peso5g | Freq. | Percent | Cum.   |
|--------|-------|---------|--------|
| 1      | 138   | 12.42   | 12.42  |
| 2      | 504   | 45.36   | 57.79  |
| 3      | 316   | 28.44   | 86.23  |
| 4      | 123   | 11.07   | 97.30  |
| 5      | 30    | 2.70    | 100.00 |
| Total  | 1,111 | 100.00  |        |

- 20 . gen alt2g= altura
- 21 . replace alt2g=1 if alt2g>=1.38& alt2g<1.48  
 (9 real changes made)
- 22 . replace alt2g=2 if alt2g>=1.48& alt2g<1.58  
 (249 real changes made)
- 23 . replace alt2g=3 if alt2g>=1.58& alt2g<1.68  
 (601 real changes made)
- 24 . replace alt2g=4 if alt2g>=1.68& alt2g<1.78  
 (204 real changes made)
- 25 . replace alt2g=5 if alt2g>=1.78  
 (1102 real changes made)
- 26 . tab alt2g

| alt2g | Freq. | Percent | Cum.   |
|-------|-------|---------|--------|
| 1     | 9     | 0.81    | 0.81   |
| 5     | 1,102 | 99.19   | 100.00 |
| Total | 1,111 | 100.00  |        |

```

27 . gen altura2g= altura
28 . replace altura2g=5 if altura2g>=1.78
    (48 real changes made)
29 . replace altura2g=1 if altura2g>=1.38& altura2g<1.48
    (0 real changes made)
30 . replace altura2g=1 if altura2g>=1.38& altura2g<1.48
    (9 real changes made)
31 . replace altura2g=2 if altura2g>=1.48& altura2g<1.58
    (249 real changes made)
32 . replace altura2g=3 if altura2g>=1.58& altura2g<1.68
    (601 real changes made)
33 . replace altura2g=4 if altura2g>=1.68& altura2g<1.78
    (204 real changes made)
34 . tab altura2g

```

| altura2g | Freq. | Percent | Cum.   |
|----------|-------|---------|--------|
| 1        | 9     | 0.81    | 0.81   |
| 2        | 249   | 22.41   | 23.22  |
| 3        | 601   | 54.10   | 77.32  |
| 4        | 204   | 18.36   | 95.68  |
| 5        | 48    | 4.32    | 100.00 |
| Total    | 1,111 | 100.00  |        |

```

35 . gen ca5g= ca
36 . replace ca5g =5 if ca5g>=114,5
    option 5 not allowed
    r(198);
37 . replace ca5g=5 if ca5g>=114,5
    option 5 not allowed
    r(198);
38 . replace ca5g=5 if ca5g>=114.5
    (32 real changes made)
39 . replace ca5g=1 if ca5g>=34,5& ca5g<54,5
    invalid '5'
    r(198);
40 . replace ca5g=1 if ca5g>=34,5& ca5g<54.5
    option 5 not allowed
    r(198);
41 . replace ca5g=1 if ca5g>=34.5 & ca5g<54.5
    (8 real changes made)

```

42 . replace ca5g=2 if ca5g>=54.5 & ca5g<74.5  
(219 real changes made)

43 . replace ca5g=3 if ca5g>=74.5 & ca5g<94.5  
(568 real changes made)

44 . replace ca5g=4 if ca5g>=94.5 & ca5g<114.5  
(284 real changes made)

45 . tab ca5g

| ca5g  | Freq. | Percent | Cum.   |
|-------|-------|---------|--------|
| 1     | 8     | 0.72    | 0.72   |
| 2     | 219   | 19.71   | 20.43  |
| 3     | 568   | 51.13   | 71.56  |
| 4     | 284   | 25.56   | 97.12  |
| 5     | 32    | 2.88    | 100.00 |
| Total | 1,111 | 100.00  |        |

46 . tab smaha2 sex, row col chi

|                          |
|--------------------------|
| Key                      |
| <i>frequency</i>         |
| <i>row percentage</i>    |
| <i>column percentage</i> |

| smaha2 | sex                    |                        | Total                     |
|--------|------------------------|------------------------|---------------------------|
|        | 0                      | 1                      |                           |
| 0      | 92<br>12.04<br>67.65   | 672<br>87.96<br>68.92  | 764<br>100.00<br>68.77    |
| 1      | 44<br>12.68<br>32.35   | 303<br>87.32<br>31.08  | 347<br>100.00<br>31.23    |
| Total  | 136<br>12.24<br>100.00 | 975<br>87.76<br>100.00 | 1,111<br>100.00<br>100.00 |

Pearson chi2(1) = 0.0905 Pr = 0.764

47 . tab smidf2 sex, row col chi

|                          |
|--------------------------|
| Key                      |
| <i>frequency</i>         |
| <i>row percentage</i>    |
| <i>column percentage</i> |



| smidf2 | sex                    |                        | Total                     |
|--------|------------------------|------------------------|---------------------------|
|        | 0                      | 1                      |                           |
| 0      | 93<br>11.91<br>68.38   | 688<br>88.09<br>70.56  | 781<br>100.00<br>70.30    |
| 1      | 43<br>13.03<br>31.62   | 287<br>86.97<br>29.44  | 330<br>100.00<br>29.70    |
| Total  | 136<br>12.24<br>100.00 | 975<br>87.76<br>100.00 | 1,111<br>100.00<br>100.00 |

Pearson chi2(1) = 0.2721 Pr = 0.602

48 . tab smncep2 sex, row col chi

|                          |
|--------------------------|
| Key                      |
| <i>frequency</i>         |
| <i>row percentage</i>    |
| <i>column percentage</i> |

| smncep2 | sex                    |                        | Total                     |
|---------|------------------------|------------------------|---------------------------|
|         | 0                      | 1                      |                           |
| 0       | 97<br>11.81<br>71.32   | 724<br>88.19<br>74.26  | 821<br>100.00<br>73.90    |
| 1       | 39<br>13.45<br>28.68   | 251<br>86.55<br>25.74  | 290<br>100.00<br>26.10    |
| Total   | 136<br>12.24<br>100.00 | 975<br>87.76<br>100.00 | 1,111<br>100.00<br>100.00 |

Pearson chi2(1) = 0.5322 Pr = 0.466

49 . tab smbarb2 sex, row col chi

|                          |
|--------------------------|
| Key                      |
| <i>frequency</i>         |
| <i>row percentage</i>    |
| <i>column percentage</i> |

| smbarb2 | sex                  |                       | Total                  |
|---------|----------------------|-----------------------|------------------------|
|         | 0                    | 1                     |                        |
| 0       | 92<br>11.68<br>67.65 | 696<br>88.32<br>71.38 | 788<br>100.00<br>70.93 |
| 1       | 44<br>13.62<br>32.35 | 279<br>86.38<br>28.62 | 323<br>100.00<br>29.07 |
| Total   | 136<br>12.24         | 975<br>87.76          | 1,111<br>100.00        |

| 100.00 100.00 | 100.00

Pearson chi2(1) = 0.8085 Pr = 0.369

50 . tab smegir2 sex, row col chi

|                          |
|--------------------------|
| Key                      |
| <i>frequency</i>         |
| <i>row percentage</i>    |
| <i>column percentage</i> |

| smegir2 | sex    |        | Total  |
|---------|--------|--------|--------|
|         | 0      | 1      |        |
| 0       | 123    | 936    | 1,059  |
|         | 11.61  | 88.39  | 100.00 |
|         | 90.44  | 96.00  | 95.32  |
| 1       | 13     | 39     | 52     |
|         | 25.00  | 75.00  | 100.00 |
|         | 9.56   | 4.00   | 4.68   |
| Total   | 136    | 975    | 1,111  |
|         | 12.24  | 87.76  | 100.00 |
|         | 100.00 | 100.00 | 100.00 |

Pearson chi2(1) = 8.2665 Pr = 0.004

51 . tab smaace2 sex, row col chi

|                          |
|--------------------------|
| Key                      |
| <i>frequency</i>         |
| <i>row percentage</i>    |
| <i>column percentage</i> |

| smaace2 | sex    |        | Total  |
|---------|--------|--------|--------|
|         | 0      | 1      |        |
| 0       | 101    | 862    | 963    |
|         | 10.49  | 89.51  | 100.00 |
|         | 74.26  | 88.41  | 86.68  |
| 1       | 35     | 113    | 148    |
|         | 23.65  | 76.35  | 100.00 |
|         | 25.74  | 11.59  | 13.32  |
| Total   | 136    | 975    | 1,111  |
|         | 12.24  | 87.76  | 100.00 |
|         | 100.00 | 100.00 | 100.00 |

Pearson chi2(1) = 20.6828 Pr = 0.000

52 . save "C:\Users\enfae\Documents\síndrome metabólica\Projeto 2021\calculos STATA\calculos tabel  
file C:\Users\enfae\Documents\síndrome metabólica\Projeto 2021\calculos STATA\calculos tabel

53 . save "C:\Users\enfae\Documents\síndrome metabólica\Projeto 2021\Banco de dados SM Magno\ba  
file C:\Users\enfae\Documents\síndrome metabólica\Projeto 2021\Banco de dados SM Magno\banco

54 .

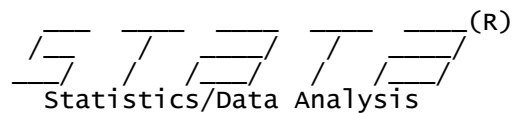

User: calculo tab 2 carct clinicas{space -6}

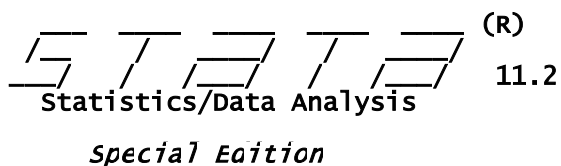

Copyright 1985-2009 StataCorp LP  
 StataCorp  
 4905 Lakeway Drive  
 College Station, Texas 77845 USA  
 800-STATA-PC <http://www.stata.com>  
 979-696-4600 [stata@stata.com](mailto:stata@stata.com)  
 979-696-4601 (fax)

Single-user Stata license expires 31 Dec 9999:  
 Serial number: 71606281563  
 Licensed to: STATAForAll  
 STATA

Notes:

1. (/m# option or -set memory-) 50.00 MB allocated to data
2. (/v# option or -set maxvar-) 5000 maximum variables

```
1 . use "C:\Users\enfae\Documents\síndrome metabólica\Projeto 2021\Banco de dados SM Magno\"
2 . bysort sex: sum pasis
```

-> sex = 0

| Variable | Obs | Mean     | Std. Dev. | Min | Max |
|----------|-----|----------|-----------|-----|-----|
| pasis    | 136 | 123.7059 | 14.09445  | 100 | 160 |

-> sex = 1

| Variable | Obs | Mean     | Std. Dev. | Min | Max |
|----------|-----|----------|-----------|-----|-----|
| pasis    | 975 | 116.5805 | 15.44186  | 80  | 180 |

```
3 . bysort sex: sum padias
```

-> sex = 0

| Variable | Obs | Mean     | Std. Dev. | Min | Max |
|----------|-----|----------|-----------|-----|-----|
| padias   | 136 | 82.55147 | 9.417729  | 60  | 100 |

-> sex = 1

| Variable | Obs | Mean     | Std. Dev. | Min | Max |
|----------|-----|----------|-----------|-----|-----|
| padias   | 975 | 77.02667 | 10.61     | 50  | 120 |

```
4 . bysort sex: sum ca
```

-> sex = 0

| Variable | Obs | Mean     | Std. Dev. | Min  | Max |
|----------|-----|----------|-----------|------|-----|
| ca       | 136 | 89.60294 | 15.71389  | 34.5 | 129 |

-> sex = 1

| Variable | Obs | Mean     | Std. Dev. | Min | Max |
|----------|-----|----------|-----------|-----|-----|
| ca       | 975 | 86.33487 | 14.11161  | 38  | 143 |

5 . bysort sex: sum hgt

-> sex = 0

| Variable | Obs | Mean     | Std. Dev. | Min | Max |
|----------|-----|----------|-----------|-----|-----|
| hgt      | 136 | 86.19191 | 16.08583  | 49  | 124 |

-> sex = 1

| Variable | Obs | Mean     | Std. Dev. | Min | Max |
|----------|-----|----------|-----------|-----|-----|
| hgt      | 975 | 84.48092 | 18.04765  | 41  | 220 |

6 . bysort sex: sum trigl

-> sex = 0

| Variable | Obs | Mean     | Std. Dev. | Min | Max |
|----------|-----|----------|-----------|-----|-----|
| trigl    | 136 | 148.1757 | 67.27139  | 30  | 486 |

-> sex = 1

| Variable | Obs | Mean     | Std. Dev. | Min | Max |
|----------|-----|----------|-----------|-----|-----|
| trigl    | 975 | 132.4146 | 55.24067  | 26  | 362 |

7 . bysort sex: sum hd1

-> sex = 0

| Variable | Obs | Mean     | Std. Dev. | Min | Max |
|----------|-----|----------|-----------|-----|-----|
| hd1      | 136 | 57.72794 | 27.02426  | 19  | 207 |

-> sex = 1

| Variable | Obs | Mean     | Std. Dev. | Min | Max |
|----------|-----|----------|-----------|-----|-----|
| hd1      | 975 | 58.80178 | 31.30097  | 18  | 270 |

8 . bysort sex: sum imc

-> sex = 0

| Variable | Obs | Mean     | Std. Dev. | Min      | Max      |
|----------|-----|----------|-----------|----------|----------|
| imc      | 136 | 27.55801 | 4.505698  | 19.72318 | 41.01563 |

-> sex = 1

| Variable | Obs | Mean     | Std. Dev. | Min      | Max   |
|----------|-----|----------|-----------|----------|-------|
| imc      | 975 | 26.18554 | 4.642457  | 15.58957 | 43.75 |

9 . tab sex

| sex   | Freq. | Percent | Cum.   |
|-------|-------|---------|--------|
| 0     | 136   | 12.24   | 12.24  |
| 1     | 975   | 87.76   | 100.00 |
| Total | 1,111 | 100.00  |        |

10 . ttest pasis, by sex  
**option by incorrectly specified**  
r(198):

11 . ttest pasis, by (sex)

Two-sample t test with equal variances

| Group    | Obs  | Mean     | Std. Err. | Std. Dev. | [95% Conf. Interval] |          |
|----------|------|----------|-----------|-----------|----------------------|----------|
| 0        | 136  | 123.7059 | 1.208589  | 14.09445  | 121.3157             | 126.0961 |
| 1        | 975  | 116.5805 | .4945354  | 15.44186  | 115.61               | 117.551  |
| combined | 1111 | 117.4527 | .4636714  | 15.45494  | 116.543              | 118.3625 |
| diff     |      | 7.12537  | 1.399032  |           | 4.38032              | 9.870419 |

diff = mean(0) - mean(1) t = 5.0931  
 Ho: diff = 0 degrees of freedom = 1109

Ha: diff < 0 Ha: diff != 0 Ha: diff > 0  
 Pr(T < t) = 1.0000 Pr(|T| > |t|) = 0.0000 Pr(T > t) = 0.0000

12 . ttest hgt, by (sex)

Two-sample t test with equal variances

| Group    | Obs  | Mean     | Std. Err. | Std. Dev. | [95% Conf. Interval] |          |
|----------|------|----------|-----------|-----------|----------------------|----------|
| 0        | 136  | 86.19191 | 1.379349  | 16.08583  | 83.46398             | 88.91984 |
| 1        | 975  | 84.48092 | .5779874  | 18.04765  | 83.34668             | 85.61517 |
| combined | 1111 | 84.69037 | .5346625  | 17.82119  | 83.64131             | 85.73943 |
| diff     |      | 1.710989 | 1.631182  |           | -1.489562            | 4.911539 |

diff = mean(0) - mean(1) t = 1.0489  
 Ho: diff = 0 degrees of freedom = 1109

Ha: diff < 0 Ha: diff != 0 Ha: diff > 0  
 Pr(T < t) = 0.8528 Pr(|T| > |t|) = 0.2944 Pr(T > t) = 0.1472

13 . ttest trigl, by (sex)

Two-sample t test with equal variances

| Group    | Obs  | Mean     | Std. Err. | Std. Dev. | [95% Conf. Interval] |          |
|----------|------|----------|-----------|-----------|----------------------|----------|
| 0        | 136  | 148.1757 | 5.768474  | 67.27139  | 136.7675             | 159.584  |
| 1        | 975  | 132.4146 | 1.769117  | 55.24067  | 128.9428             | 135.8863 |
| combined | 1111 | 134.3439 | 1.711599  | 57.05044  | 130.9856             | 137.7023 |
| diff     |      | 15.76117 | 5.202961  |           | 5.552414             | 25.96993 |

diff = mean(0) - mean(1) t = 3.0293  
 Ho: diff = 0 degrees of freedom = 1109

Ha: diff < 0 Ha: diff != 0 Ha: diff > 0  
 Pr(T < t) = 0.9987 Pr(|T| > |t|) = 0.0025 Pr(T > t) = 0.0013

14 . ttest hdl, by (sex)

Two-sample t test with equal variances

| Group    | Obs  | Mean      | Std. Err. | Std. Dev. | [95% Conf. Interval] |          |
|----------|------|-----------|-----------|-----------|----------------------|----------|
| 0        | 136  | 57.72794  | 2.317311  | 27.02426  | 53.14501             | 62.31087 |
| 1        | 975  | 58.80178  | 1.002433  | 31.30097  | 56.83461             | 60.76896 |
| combined | 1111 | 58.67033  | .9240534  | 30.80024  | 56.85724             | 60.48342 |
| diff     |      | -1.073843 | 2.820374  |           | -6.607714            | 4.460028 |

diff = mean(0) - mean(1) t = -0.3807  
 Ho: diff = 0 degrees of freedom = 1109

Ha: diff < 0 Ha: diff != 0 Ha: diff > 0  
 Pr(T < t) = 0.3517 Pr(|T| > |t|) = 0.7035 Pr(T > t) = 0.6483

15 . ttest imc, by (sex)

Two-sample t test with equal variances

| Group    | Obs  | Mean     | Std. Err. | Std. Dev. | [95% Conf. Interval] |          |
|----------|------|----------|-----------|-----------|----------------------|----------|
| 0        | 136  | 27.55801 | .3863604  | 4.505698  | 26.79391             | 28.32211 |
| 1        | 975  | 26.18554 | .1486776  | 4.642457  | 25.89378             | 26.47731 |
| combined | 1111 | 26.35355 | .1393807  | 4.645791  | 26.08007             | 26.62703 |
| diff     |      | 1.372469 | .4234413  |           | .5416327             | 2.203306 |

diff = mean(0) - mean(1) t = 3.2412  
 Ho: diff = 0 degrees of freedom = 1109

Ha: diff < 0 Ha: diff != 0 Ha: diff > 0  
 Pr(T < t) = 0.9994 Pr(|T| > |t|) = 0.0012 Pr(T > t) = 0.0006

16 . ttest ca, by (sex)

Two-sample t test with equal variances

| Group    | Obs  | Mean     | Std. Err. | Std. Dev. | [95% Conf. Interval] |          |
|----------|------|----------|-----------|-----------|----------------------|----------|
| 0        | 136  | 89.60294 | 1.347455  | 15.71389  | 86.93809             | 92.26779 |
| 1        | 975  | 86.33487 | .4519332  | 14.11161  | 85.448               | 87.22175 |
| combined | 1111 | 86.73492 | .4305175  | 14.34987  | 85.8902              | 87.57964 |
| diff     |      | 3.268069 | 1.310432  |           | .6968642             | 5.839275 |

diff = mean(0) - mean(1) t = 2.4939  
 Ho: diff = 0 degrees of freedom = 1109

Ha: diff < 0 Ha: diff != 0 Ha: diff > 0  
 Pr(T < t) = 0.9936 Pr(|T| > |t|) = 0.0128 Pr(T > t) = 0.0064

17 . ttest padias, by (sex)

Two-sample t test with equal variances

| Group    | Obs  | Mean     | Std. Err. | Std. Dev. | [95% Conf. Interval] |          |
|----------|------|----------|-----------|-----------|----------------------|----------|
| 0        | 136  | 82.55147 | .8075636  | 9.417729  | 80.95436             | 84.14858 |
| 1        | 975  | 77.02667 | .3397921  | 10.61     | 76.35986             | 77.69348 |
| combined | 1111 | 77.70297 | .3187066  | 10.62302  | 77.07763             | 78.32831 |
| diff     |      | 5.524804 | .9585618  |           | 3.644005             | 7.405603 |

diff = mean(0) - mean(1) t = 5.7636  
 Ho: diff = 0 degrees of freedom = 1109

Ha: diff < 0  
Pr(T < t) = **1.0000**

Ha: diff != 0  
Pr(|T| > |t|) = **0.0000**

Ha: diff > 0  
Pr(T > t) = **0.0000**

18 .

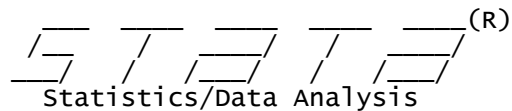

User: calculo tab 2 carct clinicas{space -6}

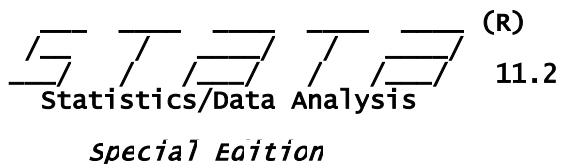

Copyright 1985-2009 stataCorp LP  
 StataCorp  
 4905 Lakeway Drive  
 College Station, Texas 77845 USA  
 800-STATA-PC <http://www.stata.com>  
 979-696-4600 [stata@stata.com](mailto:stata@stata.com)  
 979-696-4601 (fax)

Single-user Stata license expires 31 Dec 9999:  
 Serial number: 71606281563  
 Licensed to: STATAForAll  
 STATA

Notes:

1. (/m# option or -set memory-) 50.00 MB allocated to data
2. (/v# option or -set maxvar-) 5000 maximum variables

- 1 . use "C:\Users\enfae\Documents\síndrome metabólica\Projeto 2021\Banco de dados SM Magno\"
- 2 . tab glidf sex, row col chi

|                          |
|--------------------------|
| Key                      |
| <i>frequency</i>         |
| <i>row percentage</i>    |
| <i>column percentage</i> |

| glidf | sex                    |                        | Total                     |
|-------|------------------------|------------------------|---------------------------|
|       | 0                      | 1                      |                           |
| 0     | 109<br>11.78<br>80.15  | 816<br>88.22<br>83.69  | 925<br>100.00<br>83.26    |
| 1     | 27<br>14.52<br>19.85   | 159<br>85.48<br>16.31  | 186<br>100.00<br>16.74    |
| Total | 136<br>12.24<br>100.00 | 975<br>87.76<br>100.00 | 1,111<br>100.00<br>100.00 |

Pearson chi2(1) = 1.0762 Pr = 0.300

- 3 . tab gliwho sex, row col chi

|                          |
|--------------------------|
| Key                      |
| <i>frequency</i>         |
| <i>row percentage</i>    |
| <i>column percentage</i> |

| gliwho | sex                   |                       | Total                    |
|--------|-----------------------|-----------------------|--------------------------|
|        | 0                     | 1                     |                          |
| 0      | 120<br>11.67<br>88.24 | 908<br>88.33<br>93.13 | 1,028<br>100.00<br>92.53 |
| 1      | 16<br>19.28<br>11.76  | 67<br>80.72<br>6.87   | 83<br>100.00<br>7.47     |
| Total  | 136<br>12.24          | 975<br>87.76          | 1,111<br>100.00          |



| 100.00 100.00 | 100.00

Pearson chi2(1) = 4.1335 Pr = 0.042

4 . tab caidf sex, row col chi

|                          |
|--------------------------|
| Key                      |
| <i>frequency</i>         |
| <i>row percentage</i>    |
| <i>column percentage</i> |

| caidf | sex                    |                        | Total                     |
|-------|------------------------|------------------------|---------------------------|
|       | 0                      | 1                      |                           |
| 0     | 65<br>17.38<br>47.79   | 309<br>82.62<br>31.69  | 374<br>100.00<br>33.66    |
| 1     | 71<br>9.63<br>52.21    | 666<br>90.37<br>68.31  | 737<br>100.00<br>66.34    |
| Total | 136<br>12.24<br>100.00 | 975<br>87.76<br>100.00 | 1,111<br>100.00<br>100.00 |

Pearson chi2(1) = 13.8570 Pr = 0.000

5 . tab caegir sex, row col chi

|                          |
|--------------------------|
| Key                      |
| <i>frequency</i>         |
| <i>row percentage</i>    |
| <i>column percentage</i> |

| caegir | sex                    |                        | Total                     |
|--------|------------------------|------------------------|---------------------------|
|        | 0                      | 1                      |                           |
| 0      | 81<br>20.77<br>59.56   | 309<br>79.23<br>31.69  | 390<br>100.00<br>35.10    |
| 1      | 55<br>7.63<br>40.44    | 666<br>92.37<br>68.31  | 721<br>100.00<br>64.90    |
| Total  | 136<br>12.24<br>100.00 | 975<br>87.76<br>100.00 | 1,111<br>100.00<br>100.00 |

Pearson chi2(1) = 40.6839 Pr = 0.000

6 . tab cancep sex, row col chi

|                          |
|--------------------------|
| Key                      |
| <i>frequency</i>         |
| <i>row percentage</i>    |
| <i>column percentage</i> |

| cancep | sex                    |                        | Total                     |
|--------|------------------------|------------------------|---------------------------|
|        | 0                      | 1                      |                           |
| 0      | 96<br>14.72<br>70.59   | 556<br>85.28<br>57.03  | 652<br>100.00<br>58.69    |
| 1      | 40<br>8.71<br>29.41    | 419<br>91.29<br>42.97  | 459<br>100.00<br>41.31    |
| Total  | 136<br>12.24<br>100.00 | 975<br>87.76<br>100.00 | 1,111<br>100.00<br>100.00 |

Pearson chi2(1) = 9.0549 Pr = 0.003

7 . tab cabarb sex, row col chi

|                          |
|--------------------------|
| Key                      |
| <i>frequency</i>         |
| <i>row percentage</i>    |
| <i>column percentage</i> |

| cabarb | sex                    |                        | Total                     |
|--------|------------------------|------------------------|---------------------------|
|        | 0                      | 1                      |                           |
| 0      | 63<br>12.23<br>46.32   | 452<br>87.77<br>46.36  | 515<br>100.00<br>46.35    |
| 1      | 73<br>12.25<br>53.68   | 523<br>87.75<br>53.64  | 596<br>100.00<br>53.65    |
| Total  | 136<br>12.24<br>100.00 | 975<br>87.76<br>100.00 | 1,111<br>100.00<br>100.00 |

Pearson chi2(1) = 0.0001 Pr = 0.994

8 . tab hdlidf sex, row col chi

|                          |
|--------------------------|
| Key                      |
| <i>frequency</i>         |
| <i>row percentage</i>    |
| <i>column percentage</i> |

| hdlidf | sex                    |                        | Total                     |
|--------|------------------------|------------------------|---------------------------|
|        | 0                      | 1                      |                           |
| 0      | 105<br>16.88<br>77.21  | 517<br>83.12<br>53.03  | 622<br>100.00<br>55.99    |
| 1      | 31<br>6.34<br>22.79    | 458<br>93.66<br>46.97  | 489<br>100.00<br>44.01    |
| Total  | 136<br>12.24<br>100.00 | 975<br>87.76<br>100.00 | 1,111<br>100.00<br>100.00 |

Pearson chi2(1) = 28.3191 Pr = 0.000

9 . tab hdlegir sex, row col chi

|                          |
|--------------------------|
| Key                      |
| <i>frequency</i>         |
| <i>row percentage</i>    |
| <i>column percentage</i> |

| hdlegir | sex                    |                        | Total                     |
|---------|------------------------|------------------------|---------------------------|
|         | 0                      | 1                      |                           |
| 0       | 112<br>12.40<br>82.35  | 791<br>87.60<br>81.13  | 903<br>100.00<br>81.28    |
| 1       | 24<br>11.54<br>17.65   | 184<br>88.46<br>18.87  | 208<br>100.00<br>18.72    |
| Total   | 136<br>12.24<br>100.00 | 975<br>87.76<br>100.00 | 1,111<br>100.00<br>100.00 |

Pearson chi2(1) = 0.1176 Pr = 0.732

10 . tab paidf sex, row col chi

|                          |
|--------------------------|
| Key                      |
| <i>frequency</i>         |
| <i>row percentage</i>    |
| <i>column percentage</i> |

| paidf | sex                    |                        | Total                     |
|-------|------------------------|------------------------|---------------------------|
|       | 0                      | 1                      |                           |
| 0     | 99<br>10.83<br>72.79   | 815<br>89.17<br>83.59  | 914<br>100.00<br>82.27    |
| 1     | 37<br>18.78<br>27.21   | 160<br>81.22<br>16.41  | 197<br>100.00<br>17.73    |
| Total | 136<br>12.24<br>100.00 | 975<br>87.76<br>100.00 | 1,111<br>100.00<br>100.00 |

Pearson chi2(1) = 9.5354 Pr = 0.002

11 . tab pawho sex, row col chi

|                          |
|--------------------------|
| Key                      |
| <i>frequency</i>         |
| <i>row percentage</i>    |
| <i>column percentage</i> |

| pawho | sex                    |                        | Total                     |
|-------|------------------------|------------------------|---------------------------|
|       | 0                      | 1                      |                           |
| 0     | 109<br>11.02<br>80.15  | 880<br>88.98<br>90.26  | 989<br>100.00<br>89.02    |
| 1     | 27<br>22.31<br>19.85   | 94<br>77.69<br>9.64    | 121<br>100.00<br>10.89    |
| 2     | 0<br>0.00<br>0.00      | 1<br>100.00<br>0.10    | 1<br>100.00<br>0.09       |
| Total | 136<br>12.24<br>100.00 | 975<br>87.76<br>100.00 | 1,111<br>100.00<br>100.00 |

Pearson chi2(2) = 12.9378 Pr = 0.002

12 . tab trigidf sex, row col chi

| Key                      |
|--------------------------|
| <i>frequency</i>         |
| <i>row percentage</i>    |
| <i>column percentage</i> |

| trigidf | sex                    |                        | Total                     |
|---------|------------------------|------------------------|---------------------------|
|         | 0                      | 1                      |                           |
| 0       | 80<br>10.81<br>58.82   | 660<br>89.19<br>67.69  | 740<br>100.00<br>66.61    |
| 1       | 56<br>15.09<br>41.18   | 315<br>84.91<br>32.31  | 371<br>100.00<br>33.39    |
| Total   | 136<br>12.24<br>100.00 | 975<br>87.76<br>100.00 | 1,111<br>100.00<br>100.00 |

Pearson chi2(1) = 4.2207 Pr = 0.040

13 . save "C:\Users\enfae\Documents\Artigo sobre SM\Artigo revisado plos one\calculos stata .  
file C:\Users\enfae\Documents\Artigo sobre SM\Artigo revisado plos one\calculos stata tab

14 .

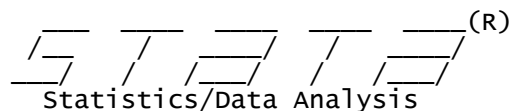

User: dicotomização SM parte 1{space -2}

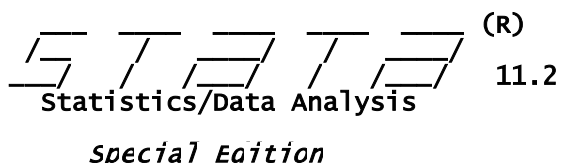

Copyright 1985-2009 StataCorp LP  
 StataCorp  
 4905 Lakeway Drive  
 College Station, Texas 77845 USA  
 800-STATA-PC <http://www.stata.com>  
 979-696-4600 [stata@stata.com](mailto:stata@stata.com)  
 979-696-4601 (fax)

Single-user Stata license expires 31 Dec 9999:  
 Serial number: 71606281563  
 Licensed to: STATAForAll  
 STATA

Notes:

1. (/m# option or -set memory-) 50.00 MB allocated to data
2. (/v# option or -set maxvar-) 5000 maximum variables

1 . use "C:\Users\enfae\Documents\síndrome metabólica\Projeto 2021\Banco de dados SM Magno\

2 . ci smbarb2

| Variable | Obs  | Mean     | Std. Err. | [95% Conf. Interval] |          |
|----------|------|----------|-----------|----------------------|----------|
| smbarb2  | 1111 | .2907291 | .0136298  | .263986              | .3174721 |

3 . ci smaha2

| Variable | Obs  | Mean     | Std. Err. | [95% Conf. Interval] |          |
|----------|------|----------|-----------|----------------------|----------|
| smaha2   | 1111 | .3123312 | .0139103  | .2850378             | .3396246 |

4 . ci smncep2

| Variable | Obs  | Mean     | Std. Err. | [95% Conf. Interval] |          |
|----------|------|----------|-----------|----------------------|----------|
| smncep2  | 1111 | .2610261 | .0131824  | .2351608             | .2868914 |

5 . ci smaace2

| Variable | Obs  | Mean     | Std. Err. | [95% Conf. Interval] |          |
|----------|------|----------|-----------|----------------------|----------|
| smaace2  | 1111 | .1332133 | .0101993  | .1132013             | .1532253 |

6 . ci smegir2

| Variable | Obs  | Mean     | Std. Err. | [95% Conf. Interval] |         |
|----------|------|----------|-----------|----------------------|---------|
| smegir2  | 1111 | .0468047 | .0063398  | .0343654             | .059244 |

7 . ci smidf2

| Variable | Obs  | Mean     | Std. Err. | [95% Conf. Interval] |          |
|----------|------|----------|-----------|----------------------|----------|
| smidf2   | 1111 | .2970297 | .0137154  | .2701188             | .3239406 |

8 . ci smidf2 by sort sex  
 variable by not found  
 r(111);

9 . by sort sex: ci smbarb2  
**variable sort not found**  
r(111):

10 . bysort sex: ci smbarb2

---

-> sex = 0

| Variable | Obs | Mean     | Std. Err. | [95% Conf. Interval] |          |
|----------|-----|----------|-----------|----------------------|----------|
| smbarb2  | 136 | .3235294 | .0402638  | .2439001             | .4031588 |

---

-> sex = 1

| Variable | Obs | Mean     | Std. Err. | [95% Conf. Interval] |         |
|----------|-----|----------|-----------|----------------------|---------|
| smbarb2  | 975 | .2861538 | .0144818  | .2577347             | .314573 |

11 . bysort sex: ci smncep2

---

-> sex = 0

| Variable | Obs | Mean     | Std. Err. | [95% Conf. Interval] |          |
|----------|-----|----------|-----------|----------------------|----------|
| smncep2  | 136 | .2867647 | .0389235  | .2097859             | .3637435 |

---

-> sex = 1

| Variable | Obs | Mean     | Std. Err. | [95% Conf. Interval] |          |
|----------|-----|----------|-----------|----------------------|----------|
| smncep2  | 975 | .2574359 | .0140095  | .2299437             | .2849281 |

12 . bysort sex: ci smegir2

---

-> sex = 0

| Variable | Obs | Mean     | Std. Err. | [95% Conf. Interval] |          |
|----------|-----|----------|-----------|----------------------|----------|
| smegir2  | 136 | .0955882 | .0253057  | .0455413             | .1456351 |

---

-> sex = 1

| Variable | Obs | Mean | Std. Err. | [95% Conf. Interval] |          |
|----------|-----|------|-----------|----------------------|----------|
| smegir2  | 975 | .04  | .0062789  | .0276782             | .0523218 |

13 . bysort sex: ci smidf2

---

-> sex = 0

| Variable | Obs | Mean     | Std. Err. | [95% Conf. Interval] |          |
|----------|-----|----------|-----------|----------------------|----------|
| smidf2   | 136 | .3161765 | .0400193  | .2370305             | .3953224 |

---

-> sex = 1

| Variable | Obs | Mean    | Std. Err. | [95% Conf. Interval] |          |
|----------|-----|---------|-----------|----------------------|----------|
| smidf2   | 975 | .294359 | .0146033  | .2657014             | .3230165 |

14 . bysort sex: ci smidf2

-> sex = 0

| Variable | Obs | Mean     | Std. Err. | [95% Conf. Interval] |          |
|----------|-----|----------|-----------|----------------------|----------|
| smidf2   | 136 | .3161765 | .0400193  | .2370305             | .3953224 |

-> sex = 1

| Variable | Obs | Mean    | Std. Err. | [95% Conf. Interval] |          |
|----------|-----|---------|-----------|----------------------|----------|
| smidf2   | 975 | .294359 | .0146033  | .2657014             | .3230165 |

15 . bysort sex: ci smaha2

-> sex = 0

| Variable | Obs | Mean     | Std. Err. | [95% Conf. Interval] |          |
|----------|-----|----------|-----------|----------------------|----------|
| smaha2   | 136 | .3235294 | .0402638  | .2439001             | .4031588 |

-> sex = 1

| Variable | Obs | Mean     | Std. Err. | [95% Conf. Interval] |          |
|----------|-----|----------|-----------|----------------------|----------|
| smaha2   | 975 | .3107692 | .0148293  | .2816681             | .3398704 |

16 . bysort sex: ci smaace2

-> sex = 0

| Variable | Obs | Mean     | Std. Err. | [95% Conf. Interval] |          |
|----------|-----|----------|-----------|----------------------|----------|
| smaace2  | 136 | .2573529 | .0376261  | .1829401             | .3317657 |

-> sex = 1

| Variable | Obs | Mean     | Std. Err. | [95% Conf. Interval] |          |
|----------|-----|----------|-----------|----------------------|----------|
| smaace2  | 975 | .1158974 | .0102567  | .0957696             | .1360253 |

17 .

```

-----
name: <unnamed>
log: C:\Users\User\OneDrive\ANALISES\JULITA\Julita.log
log type: text
opened on: 1 Aug 2021, 10:56:43

```

```
. do "C:\Users\User\AppData\Local\Temp\STD2f8_000000.tmp"
```

```
. **diagti verdadeiro_positivo falso_negativo falso_positivo verdadeiro_negativo
smbarb2 smaha2
```

```
. diagti 322 25 1 763
command diagti is unrecognized
r(199);
```

```
end of do-file
```

```
r(199);
```

```
. do "C:\Users\User\AppData\Local\Temp\STD2f8_000000.tmp"
```

```
. diagti 322 25 1 763
```

| True disease status | Test result |      | Total |
|---------------------|-------------|------|-------|
|                     | Neg.        | Pos. |       |
| Normal              | 763         | 1    | 764   |
| Abnormal            | 25          | 322  | 347   |
| Total               | 788         | 323  | 1,111 |

[95% Confidence Interval]

|                           |                   |       |       |       |
|---------------------------|-------------------|-------|-------|-------|
| Prevalence                | Pr(A)             | 31%   | 29%   | 34.1% |
| Sensitivity               | Pr(+ A)           | 92.8% | 89.5% | 95.3% |
| Specificity               | Pr(- N)           | 99.9% | 99.3% | 100%  |
| ROC area                  | (Sens. + Spec.)/2 | .963  | .95   | .977  |
| Likelihood ratio (+)      | Pr(+ A)/Pr(+ N)   | 709   | 100   | 5028  |
| Likelihood ratio (-)      | Pr(- A)/Pr(- N)   | .0721 | .0495 | .105  |
| Odds ratio                | LR(+)/LR(-)       | 9827  | 1659  | .     |
| Positive predictive value | Pr(A +)           | 99.7% | 98.3% | 100%  |
| Negative predictive value | Pr(N -)           | 96.8% | 95.4% | 97.9% |



```
. **diagti verdadeiro_positivo falso_negativo falso_positivo verdadeiro_negativo
ncep2 smaha2
```

```
. diagti 290 57 0 764
```

| True disease status | Test result |      | Total |
|---------------------|-------------|------|-------|
|                     | Neg.        | Pos. |       |
| Normal              | 764         | 0    | 764   |
| Abnormal            | 57          | 290  | 347   |
| Total               | 821         | 290  | 1,111 |

[95% Confidence Interval]

|                           |                   |       |       |       |
|---------------------------|-------------------|-------|-------|-------|
| Prevalence                | Pr(A)             | 31%   | 29%   | 34.1% |
| Sensitivity               | Pr(+ A)           | 83.6% | 79.2% | 87.3% |
| Specificity               | Pr(- N)           | 100%  | 99.5% | 100%  |
| ROC area                  | (Sens. + Spec.)/2 | .918  | .898  | .937  |
| Likelihood ratio (+)      | Pr(+ A)/Pr(+ N)   | .     | .     | .     |
| Likelihood ratio (-)      | Pr(- A)/Pr(- N)   | .164  | .13   | .208  |
| Odds ratio                | LR(+)/LR(-)       | .     | 1007  | .     |
| Positive predictive value | Pr(A +)           | 100%  | 98.7% | 100%  |
| Negative predictive value | Pr(N -)           | 93.1% | 91.1% | 94.7% |

Missing values or confidence intervals may be estimated using the -sf- or -sf0- options.

```
. **diagti verdadeiro_positivo falso_negativo falso_positivo verdadeiro_negativo
smaace2 smaha2
```

```
. diagti 144 203 4 760
```

| True disease status | Test result |      | Total |
|---------------------|-------------|------|-------|
|                     | Neg.        | Pos. |       |
| Normal              | 760         | 4    | 764   |
| Abnormal            | 203         | 144  | 347   |
| Total               | 963         | 148  | 1,111 |

| [95% Confidence Interval] |                   |       |       |       |
|---------------------------|-------------------|-------|-------|-------|
| Prevalence                | Pr(A)             | 31%   | 29%   | 34.1% |
| Sensitivity               | Pr(+ A)           | 41.5% | 36.3% | 46.9% |
| Specificity               | Pr(- N)           | 99.5% | 98.7% | 99.9% |
| ROC area                  | (Sens. + Spec.)/2 | .705  | .679  | .731  |
| Likelihood ratio (+)      | Pr(+ A)/Pr(+ N)   | 79.3  | 29.6  | 212   |
| Likelihood ratio (-)      | Pr(- A)/Pr(- N)   | .588  | .538  | .643  |
| Odds ratio                | LR(+)/LR(-)       | 135   | 51.2  | 355   |
| Positive predictive value | Pr(A +)           | 97.3% | 93.2% | 99.3% |
| Negative predictive value | Pr(N -)           | 78.9% | 76.2% | 81.5% |

```
. **diagti verdadeiro_positivo falso_negativo falso_positivo verdadeiro_negativo
smegir2 smaha2
```

```
. diagti 52 295 0 764
```

| True disease status | Test result |      | Total |
|---------------------|-------------|------|-------|
|                     | Neg.        | Pos. |       |
| Normal              | 764         | 0    | 764   |
| Abnormal            | 295         | 52   | 347   |
| Total               | 1,059       | 52   | 1,111 |

| [95% Confidence Interval] |                   |       |       |       |
|---------------------------|-------------------|-------|-------|-------|
| Prevalence                | Pr(A)             | 31%   | 29%   | 34.1% |
| Sensitivity               | Pr(+ A)           | 15%   | 11.4% | 19.2% |
| Specificity               | Pr(- N)           | 100%  | 99.5% | 100%  |
| ROC area                  | (Sens. + Spec.)/2 | .575  | .556  | .594  |
| Likelihood ratio (+)      | Pr(+ A)/Pr(+ N)   | .     | .     | .     |
| Likelihood ratio (-)      | Pr(- A)/Pr(- N)   | .85   | .813  | .889  |
| Odds ratio                | LR(+)/LR(-)       | .     | 35    | .     |
| Positive predictive value | Pr(A +)           | 100%  | 93.2% | 100%  |
| Negative predictive value | Pr(N -)           | 72.1% | 69.3% | 74.8% |

Missing values or confidence intervals may be estimated using the -sf- or -sf0- options.

```

.
.
. **diagti   verdadeiro_positivo falso_negativo falso_positivo verdadeiro_negativo
smidf2 smaha2
.
. diagti 330 17 0 764

```

| True disease status | Test result |      | Total |
|---------------------|-------------|------|-------|
|                     | Neg.        | Pos. |       |
| Normal              | 764         | 0    | 764   |
| Abnormal            | 17          | 330  | 347   |
| Total               | 781         | 330  | 1,111 |

[95% Confidence Interval]

|                           |                   |       |       |       |
|---------------------------|-------------------|-------|-------|-------|
| Prevalence                | Pr(A)             | 31%   | 29%   | 34.1% |
| Sensitivity               | Pr(+ A)           | 95.1% | 92.3% | 97.1% |
| Specificity               | Pr(- N)           | 100%  | 99.5% | 100%  |
| ROC area                  | (Sens. + Spec.)/2 | .976  | .964  | .987  |
| Likelihood ratio (+)      | Pr(+ A)/Pr(+ N)   | .     | .     | .     |
| Likelihood ratio (-)      | Pr(- A)/Pr(- N)   | .049  | .0308 | .0779 |
| Odds ratio                | LR(+)/LR(-)       | .     | 3753  | .     |
| Positive predictive value | Pr(A +)           | 100%  | 98.9% | 100%  |
| Negative predictive value | Pr(N -)           | 97.8% | 96.5% | 98.7% |

Missing values or confidence intervals may be estimated using the -sf- or -sf0- options.

```

.
end of do-file

```

```

. log close
  name: <unnamed>
  log: C:\Users\User\OneDrive\ANALISES\JULITA\Julita.log
  log type: text
  closed on: 1 Aug 2021, 11:03:53

```
